# Supplementary material for: Molecular epidemiology and comparative genomics of Campylobacter concisus strains from saliva, faeces and gut mucosal biopsies in inflammatory bowel disease
Source: PubMed Central journal article supplement (PMC5790007; doi:10.1038/s41598-018-20135-4), 2018-01-30
Supplement: 41598_2018_20135_MOESM1_ESM.pdf [file 41598_2018_20135_MOESM1_ESM.pdf]

## **Molecular epidemiology and comparative genomics of *Campylobacter concisus* strains from saliva, faeces and gut mucosal biopsies in inflammatory bowel disease**

Karina Frahm Kirk<sup>1,2\*</sup>, Guillaume Méric<sup>3</sup>, Hans Linde Nielsen<sup>4</sup>, Ben Pascoe<sup>3</sup>, Samuel K. Sheppard<sup>3,5</sup>, Ole Thorlacius-Ussing<sup>2,6</sup>, Henrik Nielsen<sup>1,2</sup>

<sup>1</sup>Department of Infectious Diseases, Aalborg University Hospital, Aalborg, Denmark. <sup>2</sup>Department of Clinical Medicine, Aalborg University, Aalborg, Denmark. <sup>3</sup>The Milner Center for Evolution, Department of Biology and Biochemistry, Bath University, Bath, United Kingdom. <sup>4</sup>Department of Clinical Microbiology, Aalborg University Hospital, Aalborg, Denmark. <sup>5</sup>Department of Zoology, University of Oxford, Oxford, UK. <sup>6</sup>Department of Gastrointestinal Surgery, Aalborg University Hospital, Aalborg, Denmark.

### **Supplementary material**

\*Corresponding author: Karina Frahm Kirk, [kfk@rn.dk](mailto:kfk@rn.dk)

**Supplementary figure 1:** A phylogenetic tree depicting the genetic relatedness of 113 *C. concisus* isolates. The tree is based on the concatenated sequences of seven *C. concisus* housekeeping genes. Each sample is annotated according to sampling site (dot=gut mucosal biopsy, triangle=saliva, diamond=faeces). Colours represent clinical presentation (red=IBD, yellow=GE, green=HC, black=reference strains). Text=BIGSdb reference and isolate ID's (more information regarding this can be found in Table S1). Reference strain *C. curvus* 525-92 is used as an outgroup.



**Supplementary table 1:** Overview of genes matching COG class description according to GS.

| <b>COG class description</b>                                  | <b>Number of corresponding genes in the GS I core genome</b> | <b>Number of corresponding genes in the GS II core genome</b> | <b>Difference in proportion of respective core genomes (%)</b> |
|---------------------------------------------------------------|--------------------------------------------------------------|---------------------------------------------------------------|----------------------------------------------------------------|
| Amino acid transport and metabolism                           | 75                                                           | 127                                                           | 2,323%                                                         |
| Carbohydrate transport and metabolism                         | 43                                                           | 82                                                            | 2,130%                                                         |
| Cell cycle control, cell division, chromosome partitioning    | 13                                                           | 27                                                            | 0,836%                                                         |
| Cell motility                                                 | 38                                                           | 56                                                            | 0,452%                                                         |
| Cell wall/membrane/envelope biogenesis                        | 46                                                           | 65                                                            | 0,305%                                                         |
| Coenzyme transport and metabolism                             | 18                                                           | 27                                                            | 0,255%                                                         |
| Defense mechanisms                                            | 12                                                           | 18                                                            | 0,170%                                                         |
| Energy production and conversion                              | 21                                                           | 30                                                            | 0,167%                                                         |
| Function unknown                                              | 10                                                           | 15                                                            | 0,142%                                                         |
| General function prediction only                              | 6                                                            | 9                                                             | 0,085%                                                         |
| Inorganic ion transport and metabolism                        | 66                                                           | 88                                                            | -0,020%                                                        |
| Intracellular trafficking, secretion, and vesicular transport | 31                                                           | 39                                                            | -0,212%                                                        |
| Lipid transport and metabolism                                | 14                                                           | 16                                                            | -0,236%                                                        |
| Multiple classes                                              | 76                                                           | 98                                                            | -0,313%                                                        |
| Nucleotide transport and metabolism                           | 44                                                           | 55                                                            | -0,332%                                                        |
| Posttranslational modification, protein turnover, chaperones  | 17                                                           | 18                                                            | -0,411%                                                        |
| Replication, recombination and repair                         | 80                                                           | 102                                                           | -0,430%                                                        |
| Secondary metabolites biosynthesis, transport and catabolism  | 24                                                           | 25                                                            | -0,615%                                                        |
| Signal transduction mechanisms                                | 74                                                           | 84                                                            | -1,297%                                                        |
| Transcription                                                 | 49                                                           | 50                                                            | -1,347%                                                        |
| Translation, ribosomal structure and biogenesis               | 104                                                          | 120                                                           | -1,653%                                                        |
| <b>Total number of genes assigned to COG</b>                  | 861                                                          | 1151                                                          |                                                                |
| <b>Total number of genes in respective core genomes</b>       | 975                                                          | 1367                                                          |                                                                |





Supplementary Table 3: CRISPR elements and *C.conciscus* plasmid integration genes for 141 *C. conciscus* genomes, and distribution in clinical groups

|                           | CRISPR-associated genes |               |               |               |               |               |               |               |               |             |               |               |             |             |                   |            |              |              |             |             |
|---------------------------|-------------------------|---------------|---------------|---------------|---------------|---------------|---------------|---------------|---------------|-------------|---------------|---------------|-------------|-------------|-------------------|------------|--------------|--------------|-------------|-------------|
|                           | <i>cas1_1</i>           | <i>cas1_2</i> | <i>cas1_3</i> | <i>cas1_4</i> | <i>cas1_5</i> | <i>cas1_6</i> | <i>cas1_7</i> | <i>cas1_8</i> | <i>cas1_9</i> | <i>cas2</i> | <i>cas2_1</i> | <i>cas2_2</i> | <i>cas3</i> | <i>cas9</i> | <i>CAS10/Csm1</i> | <i>csd</i> | <i>csd_1</i> | <i>csd_2</i> | <i>csmA</i> | <i>csm3</i> |
| Genomospecies I (n=40)    | 0                       | 0             | 10            | 0             | 0             | 0             | 0             | 0             | 0             | 0           | 10            | 0             | 0           | 0           | 10                | 25         | 1            | 40           | 0           | 10          |
| Genomospecies II (n=101)  | 44                      | 1             | 19            | 1             | 42            | 1             | 1             | 1             | 1             | 82          | 19            | 1             | 69          | 1           | 21                | 60         | 0            | 34           | 1           | 21          |
| Crohn's disease (n=28)    | 4                       | 0             | 10            | 0             | 9             | 0             | 0             | 1             | 0             | 13          | 10            | 0             | 11          | 0           | 10                | 15         | 0            | 15           | 0           | 10          |
| Gastroenteritis (n=7)     | 0                       | 0             | 0             | 0             | 1             | 0             | 0             | 0             | 0             | 1           | 0             | 0             | 1           | 0           | 0                 | 5          | 0            | 3            | 0           | 0           |
| Healthy Controls (37)     | 13                      | 0             | 9             | 0             | 11            | 1             | 0             | 0             | 0             | 23          | 9             | 0             | 19          | 0           | 10                | 21         | 1            | 24           | 0           | 10          |
| Ulcerative colitis (n=19) | 7                       | 1             | 5             | 1             | 6             | 0             | 1             | 0             | 0             | 12          | 5             | 1             | 12          | 1           | 6                 | 13         | 0            | 10           | 1           | 6           |
| UC-IPAA surgery (n=40)    | 16                      | 0             | 5             | 0             | 14            | 0             | 0             | 0             | 0             | 28          | 5             | 0             | 24          | 0           | 5                 | 24         | 0            | 19           | 0           | 5           |
| unknown (n=9)             | 4                       | 0             | 0             | 0             | 1             | 0             | 0             | 0             | 1             | 5           | 0             | 0             | 2           | 0           | 0                 | 7          | 0            | 3            | 0           | 0           |

  

|                           | <i>Campylobacter conciscus</i> plasmid integration island genes |                |              |                |                |              |              |                |                |              |                |                |               |                 |                 |               |                 |                 |                 |
|---------------------------|-----------------------------------------------------------------|----------------|--------------|----------------|----------------|--------------|--------------|----------------|----------------|--------------|----------------|----------------|---------------|-----------------|-----------------|---------------|-----------------|-----------------|-----------------|
|                           | <i>virB2</i>                                                    | <i>virB2_2</i> | <i>virB4</i> | <i>virB4_2</i> | <i>virB4_3</i> | <i>virB5</i> | <i>virB8</i> | <i>virB8_2</i> | <i>virB8_3</i> | <i>virB9</i> | <i>virB9_2</i> | <i>virB9_3</i> | <i>VirB10</i> | <i>VirB10_2</i> | <i>VirB10_3</i> | <i>VirB11</i> | <i>VirB11_2</i> | <i>VirB11_3</i> | <i>VirB11_4</i> |
| Genomospecies I (n=40)    | 1                                                               | 4              | 0            | 1              | 4              | 1            | 0            | 1              | 5              | 0            | 1              | 5              | 5             | 0               | 1               | 7             | 5               | 0               | 1               |
| Genomospecies II (n=101)  | 3                                                               | 2              | 2            | 3              | 12             | 3            | 2            | 3              | 13             | 2            | 3              | 12             | 12            | 2               | 3               | 10            | 12              | 2               | 3               |
| Crohn's disease (n=28)    | 3                                                               | 5              | 0            | 3              | 8              | 3            | 0            | 3              | 9              | 0            | 3              | 9              | 9             | 0               | 3               | 1             | 9               | 0               | 3               |
| Gastroenteritis (n=7)     | 1                                                               | 1              | 0            | 1              | 0              | 1            | 0            | 1              | 1              | 0            | 1              | 0              | 0             | 0               | 1               | 0             | 0               | 0               | 1               |
| Healthy Controls (37)     | 0                                                               | 0              | 0            | 0              | 4              | 0            | 0            | 0              | 4              | 0            | 0              | 4              | 4             | 0               | 0               | 1             | 4               | 0               | 0               |
| Ulcerative colitis (n=19) | 0                                                               | 0              | 2            | 0              | 0              | 0            | 2            | 0              | 0              | 2            | 0              | 0              | 0             | 2               | 0               | 4             | 0               | 2               | 0               |
| UC-IPAA surgery (n=40)    | 0                                                               | 0              | 0            | 0              | 4              | 0            | 0            | 0              | 4              | 0            | 0              | 4              | 4             | 0               | 0               | 9             | 4               | 0               | 0               |
| unknown (n=9)             | 0                                                               | 0              | 0            | 0              | 0              | 0            | 0            | 0              | 0              | 0            | 0              | 0              | 0             | 0               | 0               | 2             | 0               | 0               | 0               |

**Supplementary table 4:**

Overview of isolates, grouped by individual patients. The genetic relatedness of these isolates is depicted in Supplementary figure 1.

| Patient ID     | Group  | Age    | Sex | Isolate ID      | Source | Location (of biopsy) |
|----------------|--------|--------|-----|-----------------|--------|----------------------|
| 3UC            | UC     | 44     | M   | AAUH-3UCce      | Biopsy | Cecum                |
|                |        |        |     | AAUH-3UCce2     | Biopsy | Cecum 2              |
| 4UC            | UC     | 33     | F   | AAUH-4UCti      | Biopsy | Terminal ileum       |
|                |        |        |     | AAUH-4UCti-a    | Biopsy | Terminal ileum       |
| 5CD            | CD     | 24     | M   | AAUH-5CDo       | Saliva |                      |
| 7UC            | IPAA   | 51     | F   | AAUH-7UCil      | Biopsy | Ileum                |
| 8UC            | IPAA   | 41     | M   | AAUH-8UCo       | Saliva |                      |
|                |        |        |     | AAUH-8UCpp      | Biopsy | Proximal pouch       |
|                |        |        |     | AAUH-8UCpp-a    | Biopsy | Proximal pouch       |
| 9UC            | IPAA   | 45     | M   | AAUH-9UCpp      | Biopsy | Proximal pouch       |
|                |        |        |     | AAUH-9UCdp      | Biopsy | Distal pouch         |
| 10UC           | IPAA   | 46     | M   | AAUH-10UCf2     | Faeces |                      |
|                |        |        |     | AAUH-10UCil-a   | Biopsy | Ileum                |
| 11UC           | UC     | 63     | F   | AAUH-11UCco     | Saliva |                      |
|                |        |        |     | AAUH-11UCdes-a  | Biopsy | Descending colon     |
|                |        |        |     | AAUH-11UCsig-a  | Biopsy | Sigmoideum           |
| 12CD           | CD     | 63     | F   | AAUH-12CDo      | Saliva |                      |
|                |        |        |     | AAUH-12CDti2-a  | Biopsy | Terminal ileum 2     |
|                |        |        |     | AAUH-12CDti4-a  | Biopsy | Terminal ileum 4     |
|                |        |        |     | AAUH-12CDti5-a  | Biopsy | Terminal ileum 5     |
|                |        |        |     | AAUH-12CDce     | Biopsy | Cecum                |
|                |        |        |     | AAUH-12CDtra-a  | Biopsy | Transverse colon     |
|                |        |        |     | AAUH-12CDtra2-a | Biopsy | Transverse colon 2   |
|                |        |        |     | AAUH-12CDdes2   | Biopsy | Descending colon 2   |
|                |        |        |     | AAUH-12CDdes3   | Biopsy | Descending colon 3   |
|                |        |        |     | AAUH-12CDdes4   | Biopsy | Descending colon 4   |
|                |        |        |     | AAUH-12CDsig    | Biopsy | Sigmoideum           |
| AAUH-12CDrec-a | Biopsy | Rectum |     |                 |        |                      |
| 15UC           | IPAA   | 28     | M   | AAUH-15UCpp     | Biopsy | Proximal pouch       |
|                |        |        |     | AAUH-15UCdp     | Biopsy | Distal pouch         |
|                |        |        |     | AAUH-15UCdp-a   | Biopsy | Distal pouch         |
| 16UC           | IPAA   | 48     | F   | AAUH-16UCo-a    | Saliva |                      |
|                |        |        |     | AAUH-16UCdp     | Biopsy | Distal pouch         |
|                |        |        |     | AAUH-16UCdp3    | Biopsy | Distal pouch 3       |
|                |        |        |     | AAUH-16UCdp5    | Biopsy | Distal pouch 5       |
|                |        |        |     | AAUH-16UCf      | Faeces |                      |
|                |        |        |     | AAUH-16UCf2     | Faeces |                      |
| AAUH-16UCf3    | Faeces |        |     |                 |        |                      |
| 20UC           | IPAA   | 56     | F   | AAUH-20UCco     | Saliva |                      |
|                |        |        |     | AAUH-20UCf      | Faeces |                      |
| 22UC           | IPAA   | 44     | M   | AAUH-22UCpp-a   | Biopsy | Proximal pouch       |
| 35UC           | IPAA   | 23     | F   | AAUH-35UCil-a   | Biopsy | Ileum                |
|                |        |        |     | AAUH-35UCil2-a  | Biopsy | Ileum 2              |
|                |        |        |     | AAUH-35UCil3-a  | Biopsy | Ileum 3              |
|                |        |        |     | AAUH-35UCil4-a  | Biopsy | Ileum 4              |



|      |      |    |   |                |        |                    |
|------|------|----|---|----------------|--------|--------------------|
|      |      |    |   | AAUH-35UCpp    | Biopsy | Proximal pouch     |
|      |      |    |   | AAUH-35UCdp    | Biopsy | Distal pouch       |
|      |      |    |   | AAUH-35UCf     | Faeces |                    |
| 37UC | IPAA | 49 | M | AAUH-37UCo-a   | Saliva |                    |
|      |      |    |   | AAUH-37UCf     | Faeces |                    |
| 39CD | CD   | 30 | M | AAUH-39CDti-a  | Biopsy | Terminal ileum     |
|      |      |    |   | AAUH-39CDrec-a | Biopsy | Rectum             |
|      |      |    |   | AAUH-39CDf     | Faeces |                    |
| 40UC | UC   | 51 | M | AAUH-40UCf     | Faeces |                    |
| 43UC | UC   | 67 | F | AAUH-43UCce-a  | Biopsy | Cecum              |
|      |      |    |   | AAUH-43UCf     | Faeces |                    |
| 44UC | UC   | 36 | M | AAUH-44UCsig-a | Biopsy | Sigmoideum         |
|      |      |    |   | AAUH-44UCsig6  | Biopsy | Sigmoideum 6       |
| 47UC | IPAA | 38 | F | AAUH-47UCil    | Biopsy | Ileum              |
|      |      |    |   | AAUH-47UCil-a  | Biopsy | Ileum              |
| 48UC | IPAA | 21 | M | AAUH-48UCo-a   | Saliva |                    |
|      |      |    |   | AAUH-48UCil-a  | Biopsy | Ileum              |
|      |      |    |   | AAUH-48UCdp-a  | Biopsy | Distal pouch       |
| 49UC | IPAA | 38 | F | AAUH-49UCil-a  | Biopsy | Ileum              |
|      |      |    |   | AAUH-49UCpp-a  | Biopsy | Proximal pouch     |
|      |      |    |   | AAUH-49UCf     | Faeces | Faeces             |
| 51UC | IPAA | 41 | M | AAUH-51UCf     | Faeces |                    |
| 55UC | UC   | 57 | F | AAUH-55UCtra-a | Biopsy | Transverse colon   |
| 58UC | UC   | 68 | F | AAUH-58UCo     | Saliva |                    |
| 59UC | IPAA | 42 | M | AAUH-59UCpp-a  | Biopsy | Proximal pouch     |
| 2HC  | HC   | 73 | M | AAUH-2HCtra    | Biopsy | Transverse colon   |
| 3HC  | HC   | 44 | M | AAUH-3HCo      | Saliva |                    |
|      |      |    |   | AAUH-3HCce2    | Biopsy | Cecum 2            |
| 6HC  | HC   | 66 | M | AAUH-6HCo-a    | Saliva |                    |
| 8HC  | HC   | 45 | F | AAUH-8HCo      | Saliva |                    |
|      |      |    |   | AAUH-8HCo-a    | Saliva |                    |
| 9HC  | HC   | 57 | M | AAUH-9HCce     | Biopsy | Cecum              |
|      |      |    |   | AAUH-9HCasc    | Biopsy | Ascending colon    |
| 10HC | HC   | 63 | F | AAUH-10HCce    | Biopsy | Cecum              |
|      |      |    |   | AAUH-10HCdes   | Biopsy | Descending colon   |
|      |      |    |   | AAUH-10HCdes2  | Biopsy | Descending colon 2 |
|      |      |    |   | AAUH-10HCdes3  | Biopsy | Descending colon 3 |
|      |      |    |   | AAUH-10HCdes4  | Biopsy | Descending colon 4 |
|      |      |    |   | AAUH-10HCdes5  | Biopsy | Descending colon 5 |
|      |      |    |   | AAUH-10HCdes6  | Biopsy | Descending colon 6 |
|      |      |    |   | AAUH-10HCdes7  | Biopsy | Descending colon 7 |
|      |      |    |   | AAUH-10HCtra   | Biopsy | Transverse colon   |
| 11HC | HC   | 66 | F | AAUH-11HCf     | Faeces |                    |
|      |      |    |   | AAUH-11HCo-a   | Saliva |                    |
| 12HC | HC   | 56 | M | AAUH-12HCf     | Faeces |                    |
| 14HC | HC   | 69 | M | AAUH-14HCce    | Biopsy | Cecum              |
| 15HC | HC   | 53 | M | AAUH-15HCti    | Biopsy | Terminal ileum     |
| 19HC | HC   | 67 | F | AAUH-19HCf     | Faeces |                    |
|      |      |    |   | AAUH-19HCf2    | Faeces |                    |
| 20HC | HC   | 49 | F | AAUH-20HCasc   | Biopsy |                    |
|      |      |    |   | AAUH-20HCsig-a | Biopsy | Sigmoideum         |

|            |    |    |   |                 |        |                  |
|------------|----|----|---|-----------------|--------|------------------|
|            |    |    |   | AAUH-20HCrec-a  | Biopsy | Rectum           |
| 1D         | D  | 57 | F | AAUH-1Dce       | Biopsy | Cecum            |
|            |    |    |   | AAUH-1Dasc      | Biopsy | Ascending colon  |
|            |    |    |   | AAUH-1Dtra      | Biopsy | Transverse colon |
|            |    |    |   | AAUH-2012179281 | Faeces | *                |
| 2010376221 | D  | 65 | M | AAUH-2010376221 | Faeces |                  |
| 2D         | D  | 20 | F | AAUH-25Df       | Faeces |                  |
|            |    |    |   | AAUH-25Df3      | Faeces | **               |
| Ref.       | HC |    |   | ATCC 51561      | Faeces |                  |
| Ref.       | CD | 12 | M | UNSW3           | Biopsy |                  |
| Ref.       | D  |    |   | UNSW1           | Faeces |                  |
| Ref.       | CD |    |   | UNSWCD          | Biopsy |                  |
| Ref.       | D  |    |   | UNSWCS          | Faeces |                  |
| Ref.       | D  |    |   | ATCC 51562      | Faeces |                  |
| Ref.       | CD | 3  | M | UNSW2           | Biopsy |                  |
| Ref.       | D  |    |   | 13826           | Faeces |                  |
| Ref.       |    |    |   | ATCC 33237      | Saliva |                  |

Abbreviations: CD: Crohn's disease, UC: Ulcerative colitis, IPAA: J-pouch, HC: healthy control, D:Diarrhea. Isolate ID's indicate patient and isolate source. Isolates ending in -a indicate derivation from cultivation in anaerobic atmosphere, all others derive from microaerobic incubation. Ref.: reference isolates from ncbi.gov. Individual isolates from the same location (i.e. same agarplate) are numerated accordingly. Isolates with only numerical IDs derive from previous studies on patients with persistent diarrhea.\* Isolate from faeces taken 4 years prior to isolates from the current study \*\*Isolate derived from different faecal sample taken three months after initial faecal sample and after two weeks treatment with ciprofloxacin.

**Supplementary table 5:**

Overview of genome assembly information

|    | <b>Isolate ID</b> | <b>Disease</b> | <b>Source</b> | <b>Genome size (Mbp)</b> | <b>Contigs</b> | <b>N50</b> | <b>GC content (%)</b> |
|----|-------------------|----------------|---------------|--------------------------|----------------|------------|-----------------------|
| 1  | AAUH-3UCce        | UC             | Biopsy        | 1.93                     | 44             | 103045     | 39.49                 |
| 2  | AAUH-3UCce2       | UC             | Biopsy        | 1.93                     | 38             | 101107     | 39.50                 |
| 3  | AAUH-4UCti        | UC             | Biopsy        | 1.98                     | 54             | 97028      | 39.26                 |
| 4  | AAUH-4UCti-a      | UC             | Biopsy        | 1.98                     | 51             | 97971      | 39.20                 |
| 5  | AAUH-5CDo         | CD             | Saliva        | 2.10                     | 183            | 89584      | 37.26                 |
| 6  | AAUH-7UCil        | IPAA           | Biopsy        | 1.98                     | 58             | 95686      | 39.44                 |
| 7  | AAUH-8UCo         | IPAA           | Saliva        | 1.99                     | 41             | 154956     | 39.48                 |
| 8  | AAUH-8UCpp        | IPAA           | Biopsy        | 2.02                     | 3              | 82883      | 39.46                 |
| 9  | AAUH-8UCpp-a      | IPAA           | Biopsy        | 1.87                     | 92             | 39071      | 39.66                 |
| 10 | AAUH-9UCpp        | IPAA           | Biopsy        | 1.82                     | 47             | 79679      | 39.64                 |
| 11 | AAUH-9UCdp        | IPAA           | Biopsy        | 2.00                     | 102            | 59846      | 39.46                 |
| 12 | AAUH-10UCf2       | IPAA           | Faeces        | 1.99                     | 36             | 180736     | 39.59                 |
| 13 | AAUH-10UCil-a     | IPAA           | Biopsy        | 2.08                     | 103            | 180889     | 39.41                 |
| 14 | AAUH-11UCo        | UC             | Saliva        | 1.89                     | 112            | 161715     | 37.46                 |
| 15 | AAUH-11UCdes-a    | UC             | Biopsy        | 1.91                     | 51             | 58626      | 37.30                 |
| 16 | AAUH-11UCsig-a    | UC             | Biopsy        | 1.99                     | 31             | 159029     | 39.48                 |
| 17 | AAUH-12CDo        | CD             | Saliva        | 1.81                     | 29             | 197548     | 37.56                 |
| 18 | AAUH-12CDti2-a    | CD             | Biopsy        | 1.81                     | 9              | 934037     | 37.56                 |
| 19 | AAUH-12CDti4-a    | CD             | Biopsy        | 1.81                     | 34             | 83693      | 37.57                 |
| 20 | AAUH-12CDti5-a    | CD             | Biopsy        | 1.82                     | 29             | 187882     | 37.59                 |
| 21 | AAUH-12CDce       | CD             | Biopsy        | 1.86                     | 31             | 483873     | 37.46                 |
| 22 | AAUH-12CDtra-a    | CD             | Biopsy        | 1.97                     | 58             | 63299      | 39.42                 |
| 23 | AAUH-12CDtra2-a   | CD             | Biopsy        | 1.81                     | 24             | 266692     | 37.59                 |
| 24 | AAUH-12CDdes2     | CD             | Biopsy        | 1.85                     | 49             | 158794     | 37.53                 |
| 25 | AAUH-12CDdes3     | CD             | Biopsy        | 1.81                     | 54             | 77176      | 37.64                 |
| 26 | AAUH-12CDdes4     | CD             | Biopsy        | 1.85                     | 26             | 158715     | 37.46                 |
| 27 | AAUH-12CDsig      | CD             | Biopsy        | 1.90                     | 20             | 257808     | 37.34                 |
| 28 | AAUH-12CDrec-a    | CD             | Biopsy        | 1.91                     | 52             | 102065     | 39.63                 |
| 29 | AAUH-15UCpp       | IPAA           | Biopsy        | 1.90                     | 36             | 162832     | 39.66                 |
| 30 | AAUH-15UCdp       | IPAA           | Biopsy        | 2.06                     | 57             | 52907      | 39.47                 |
| 31 | AAUH-15UCdp-a     | IPAA           | Biopsy        | 2.03                     | 130            | 35098      | 39.51                 |
| 32 | AAUH-16UCo-a      | IPAA           | Saliva        | 1.88                     | 43             | 151248     | 37.68                 |
| 33 | AAUH-16UCdp       | IPAA           | Biopsy        | 1.92                     | 57             | 162832     | 39.69                 |
| 34 | AAUH-16UCdp3      | IPAA           | Biopsy        | 1.99                     | 66             | 64884      | 39.67                 |
| 35 | AAUH-16UCdp5      | IPAA           | Biopsy        | 2.04                     | 39             | 142542     | 39.48                 |
| 36 | AAUH-16UCf        | IPAA           | Faeces        | 1.89                     | 33             | 392237     | 37.68                 |
| 37 | AAUH-16UCf2       | IPAA           | Faeces        | 1.88                     | 61             | 64374      | 37.67                 |
| 38 | AAUH-16UCf3       | IPAA           | Faeces        | 1.99                     | 66             | 64884      | 39.67                 |
| 39 | AAUH-20UCo        | IPAA           | Saliva        | 1.81                     | 24             | 235464     | 37.58                 |
| 40 | AAUH-20UCf        | IPAA           | Faeces        | 1.91                     | 81             | 45189      | 39.70                 |
| 41 | AAUH-22UCpp-a     | IPAA           | Biopsy        | 2.02                     | 44             | 131008     | 39.58                 |
| 42 | AAUH-35UCil-a     | IPAA           | Biopsy        | 1.93                     | 55             | 97085      | 39.54                 |
| 43 | AAUH-35UCil2-a    | IPAA           | Biopsy        | 1.93                     | 41             | 138370     | 39.52                 |
| 44 | AAUH-35UCil3-a    | IPAA           | Biopsy        | 1.93                     | 39             | 97130      | 39.52                 |
| 45 | AAUH-35UCil4-a    | IPAA           | Biopsy        | 1.94                     | 61             | 80285      | 39.49                 |
| 46 | AAUH-35UCpp       | IPAA           | Biopsy        | 1.93                     | 40             | 134251     | 39.47                 |
| 47 | AAUH-35UCdp       | IPAA           | Biopsy        | 1.96                     | 70             | 138943     | 39.55                 |
| 48 | AAUH-35UCf        | IPAA           | Faeces        | 1.97                     | 76             | 87016      | 39.52                 |
| 49 | AAUH-37UCo-a      | IPAA           | Saliva        | 1.90                     | 41             | 89957      | 37.49                 |
| 50 | AAUH-37UCf        | IPAA           | Faeces        | 2.00                     | 54             | 87543      | 39.52                 |

|     |                 |      |        |      |     |        |       |
|-----|-----------------|------|--------|------|-----|--------|-------|
| 51  | AAUH-39CDti-a   | CD   | Biopsy | 1.93 | 62  | 120353 | 39.47 |
| 52  | AAUH-39CDrec-a  | UCD  | Biopsy | 2.01 | 94  | 42323  | 39.38 |
| 53  | AAUH-39CDf      | CD   | Faeces | 1.96 | 54  | 136855 | 39.51 |
| 54  | AAUH-40UCf      | UC   | Faeces | 2.11 | 178 | 34887  | 39.42 |
| 55  | AAUH-43UCce-a   | UC   | Biopsy | 2.01 | 118 | 73289  | 39.76 |
| 56  | AAUH-43UCf      | UC   | Faeces | 1.97 | 67  | 62023  | 39.64 |
| 57  | AAUH-44UCsig-a  | UC   | Biopsy | 2.05 | 111 | 54029  | 39.40 |
| 58  | AAUH-44UCsig6   | UC   | Biopsy | 2.02 | 235 | 16737  | 39.56 |
| 59  | AAUH-47UCil     | IPAA | Biopsy | 1.94 | 69  | 70435  | 39.78 |
| 60  | AAUH-47UCil-a   | IPAA | Biopsy | 1.92 | 90  | 42174  | 39.81 |
| 61  | AAUH-48UCo-a    | IPAA | Saliva | 1.88 | 80  | 45066  | 37.58 |
| 62  | AAUH-48UCil-a   | IPAA | Biopsy | 1.97 | 58  | 65623  | 39.70 |
| 63  | AAUH-48UCdp-a   | IPAA | Biopsy | 1.94 | 202 | 19218  | 39.78 |
| 64  | AAUH-49UCil-a   | IPAA | Biopsy | 2.12 | 160 | 43381  | 39.27 |
| 65  | AAUH-49UCpp-a   | IPAA | Biopsy | 2.1  | 162 | 52807  | 39.59 |
| 66  | AAUH-49UCf      | IPAA | Faeces | 2.22 | 118 | 97148  | 39.15 |
| 67  | AAUH-51UCf      | IPAA | Faeces | 1.9  | 61  | 100202 | 37.29 |
| 68  | AAUH-55UCtra-a  | UC   | Biopsy | 1.88 | 88  | 37875  | 37.43 |
| 69  | AAUH-58UCo      | UC   | Saliva | 2.02 | 105 | 34563  | 39.47 |
| 70  | AAUH-59UCpp-a   | IPAA | Biopsy | 1.92 | 49  | 102305 | 39.62 |
| 71  | AAUH-2HCtra     | HC   | Biopsy | 1.99 | 84  | 52482  | 39.42 |
| 72  | AAUH-3HCo       | HC   | Saliva | 2.03 | 336 | 26870  | 37.93 |
| 73  | AAUH-3HCce2     | HC   | Biopsy | 2.07 | 328 | 33756  | 39.88 |
| 74  | AAUH-6HCo-a     | HC   | Saliva | 1.78 | 85  | 32468  | 37.59 |
| 75  | AAUH-8HCo       | HC   | Saliva | 1.78 | 146 | 23267  | 37.76 |
| 76  | AAUH-8HCo-a     | HC   | Saliva | 1.81 | 132 | 25221  | 37.64 |
| 77  | AAUH-9HCce      | HC   | Biopsy | 1.98 | 189 | 21463  | 39.71 |
| 78  | AAUH-9HCasc     | HC   | Biopsy | 1.80 | 86  | 41150  | 37.68 |
| 79  | AAUH-10HCce     | HC   | Biopsy | 1.94 | 84  | 43541  | 39.61 |
| 80  | AAUH-10HCdes    | HC   | Biopsy | 1.91 | 55  | 65110  | 39.58 |
| 81  | AAUH-10HCdes2   | HC   | Biopsy | 1.90 | 79  | 59463  | 39.62 |
| 82  | AAUH-10HCdes3   | HC   | Biopsy | 1.91 | 59  | 74769  | 39.59 |
| 83  | AAUH-10HCdes4   | HC   | Biopsy | 1.90 | 90  | 45360  | 39.64 |
| 84  | AAUH-10HCdes5   | HC   | Biopsy | 1.91 | 84  | 39333  | 39.60 |
| 85  | AAUH-10HCdes6   | HC   | Biopsy | 1.98 | 102 | 36601  | 39.63 |
| 86  | AAUH-10HCdes7   | HC   | Biopsy | 1.90 | 74  | 50724  | 39.62 |
| 87  | AAUH-10HCtra    | HC   | Biopsy | 1.95 | 72  | 60348  | 39.59 |
| 88  | AAUH-11HCf      | HC   | Faeces | 1.92 | 229 | 14154  | 37.71 |
| 89  | AAUH-11HCo-a    | HC   | Saliva | 1.93 | 218 | 14905  | 37.70 |
| 90  | AAUH-12HCf      | HC   | Faeces | 1.96 | 161 | 22427  | 39.49 |
| 91  | AAUH-14HCce     | HC   | Biopsy | 1.83 | 157 | 21790  | 37.66 |
| 92  | AAUH-15HCti     | HC   | Biopsy | 1.95 | 129 | 24790  | 39.84 |
| 93  | AAUH-19HCf      | HC   | Faeces | 2.01 | 85  | 48338  | 39.51 |
| 94  | AAUH-19HCf2     | HC   | Faeces | 1.98 | 155 | 22062  | 39.64 |
| 95  | AAUH-20HCasc    | HC   | Biopsy | 2.04 | 319 | 20031  | 39.81 |
| 96  | AAUH-20HCsig-a  | HC   | Biopsy | 2.04 | 152 | 33006  | 39.43 |
| 97  | AAUH-20HCrec-a  | HC   | Biopsy | 2.00 | 82  | 84768  | 39.31 |
| 98  | AAUH-1Dce       | D    | Biopsy | 2.2  | 356 | 48282  | 39.56 |
| 99  | AAUH-1Dasc      | D    | Biopsy | 1.88 | 234 | 13858  | 39.77 |
| 100 | AAUH-1Dtra      | D    | Biopsy | 1.91 | 93  | 39458  | 39.56 |
| 101 | AAUH-2012179281 | D    | Faeces | 1.92 | 34  | 138913 | 37.35 |
| 102 | AAUH-2010376221 | D    | Faeces | 1.85 | 84  | 48012  | 37.67 |
| 103 | AAUH-25Df       | D    | Faeces | 1.81 | 31  | 134513 | 39.74 |
| 104 | AAUH-25Df3      | D    | Faeces | 2.01 | 51  | 121167 | 39.38 |
|     | ATCC 51561      |      |        |      |     |        |       |

|  |                           |  |  |  |  |  |  |
|--|---------------------------|--|--|--|--|--|--|
|  | UNSW3 (ref)               |  |  |  |  |  |  |
|  | UNSW1 (ref)               |  |  |  |  |  |  |
|  | UNSWCD (ref)              |  |  |  |  |  |  |
|  | UNSWCS (ref)              |  |  |  |  |  |  |
|  | ATCC 51562 (ref)          |  |  |  |  |  |  |
|  | UNSW2 (ref)               |  |  |  |  |  |  |
|  | 13826 (BAA-1457)<br>(ref) |  |  |  |  |  |  |
|  | ATCC 33237 (ref)          |  |  |  |  |  |  |

Table 2: Genome assembly information and NCBI accession numbers. CD: Crohn's disease, UC: Ulcerative colitis, IPAA: Ileal-pouch-anal-anastomosis (J-pouch), HC: healthy control
